# Supplementary material for: Characterization of novel SSR markers in diverse sainfoin (Onobrychis viciifolia) germplasm
Source: PubMed Central journal article supplement (PMC5006395; doi:10.1186/s12863-016-0431-0), 2016-08-30

## Additional file 1: Figure S1

**Figure S1** Relationship between modified Roger's Distance to Euclidian Distance and to Nei's Distance.

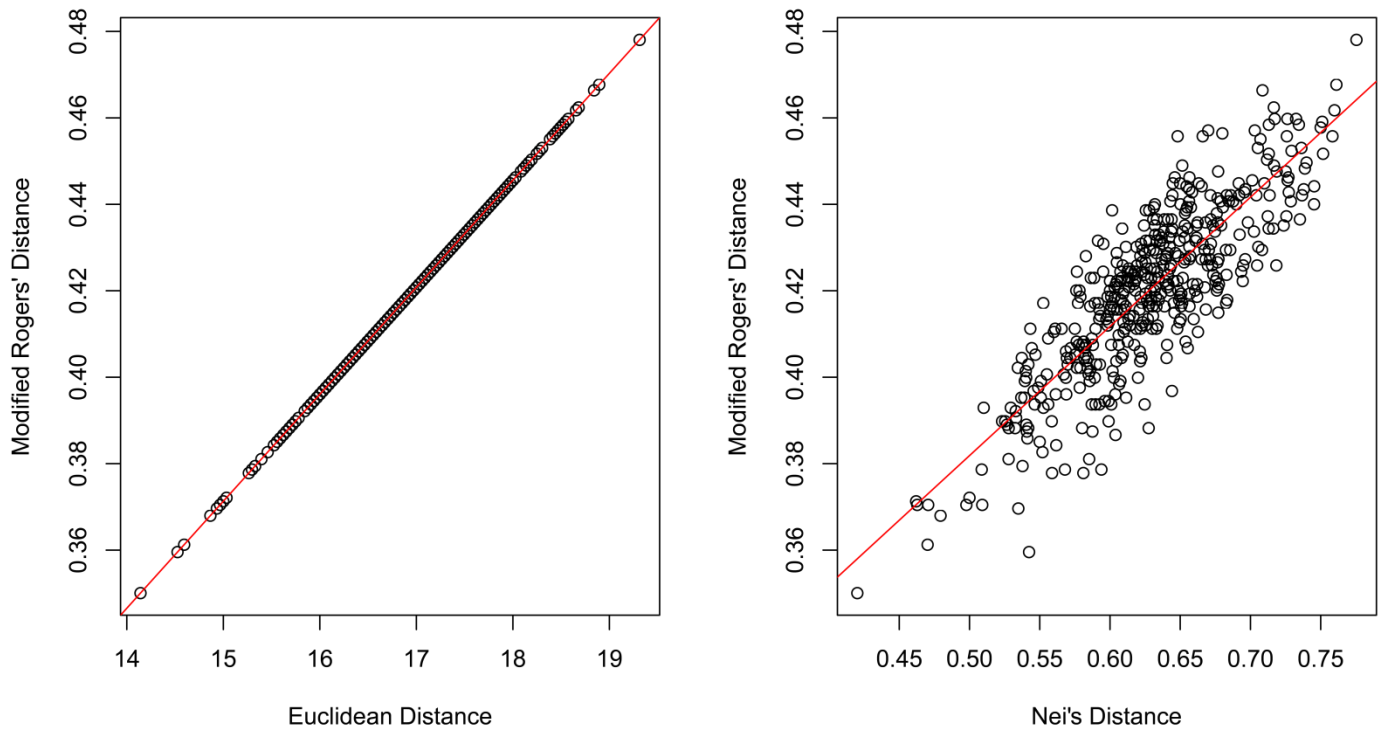

Supplement: 12863_2016_431_MOESM1_ESM.pdf [file 12863_2016_431_MOESM1_ESM.pdf]
