# Supplementary material for: Characterization of novel SSR markers in diverse sainfoin (Onobrychis viciifolia) germplasm
Source: PubMed Central journal article supplement (PMC5006395; doi:10.1186/s12863-016-0431-0), 2016-08-30

## Additional file 2: Figure S2

**Figure S2** Polymorphism Information Content (PIC) values for individual alleles at SSR loci. Different grey levels are used for better visual differentiation among alleles of the different SSR markers.

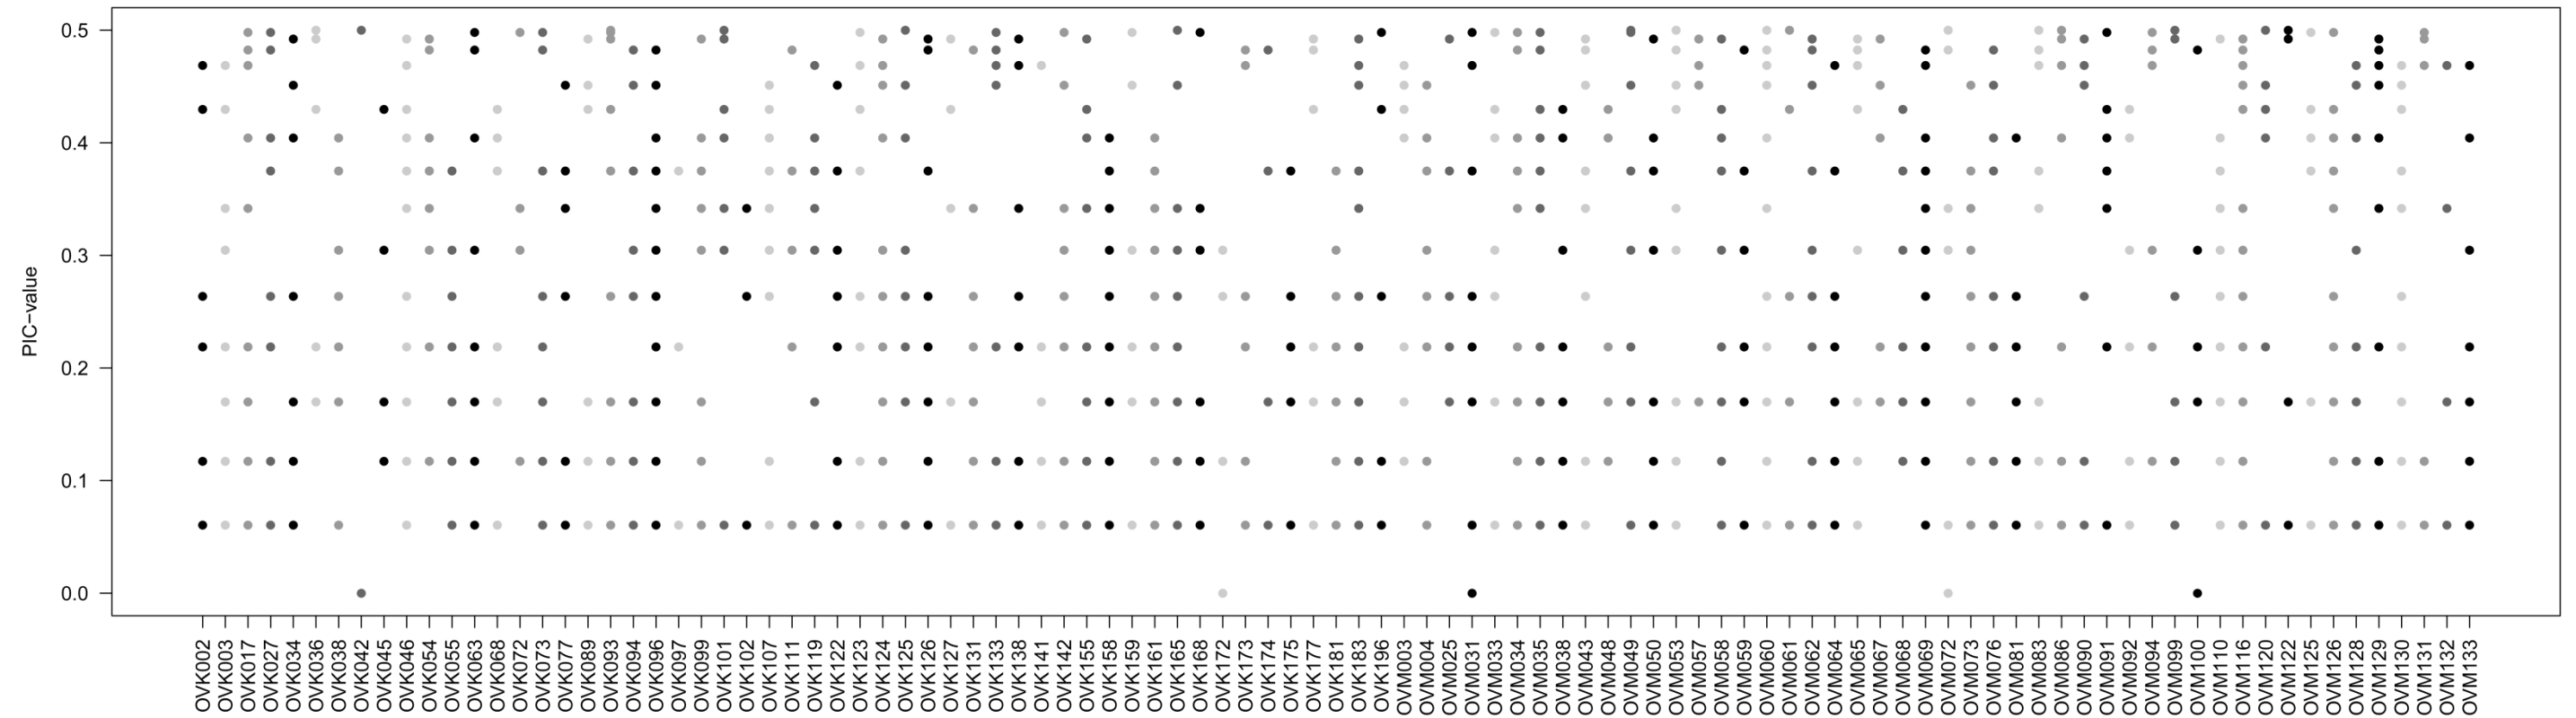

Supplement: 12863_2016_431_MOESM2_ESM.pdf [file 12863_2016_431_MOESM2_ESM.pdf]
